# Supplementary material for: Modulation of microglial metabolism facilitates regeneration in demyelination
Source: PubMed Central journal article supplement — iScience. 2023 Apr 11;26(5):106588. doi: 10.1016/j.isci.2023.106588 (PMC10149336; doi:10.1016/j.isci.2023.106588), 2023-04-11
Supplement: mmc1.pdf [file mmc1.pdf]

iScience, Volume 26

## **Supplemental information**

### **Modulation of microglial metabolism**

### **facilitates regeneration in demyelination**

**Chuan Qin, Sheng Yang, Man Chen, Ming-Hao Dong, Luo-Qi Zhou, Yun-Hui Chu, Zhu-Xia Shen, Dale B. Bosco, Long-Jun Wu, Dai-Shi Tian, and Wei Wang**

1 **Supplementary Figure 1-6 and Figure legends**

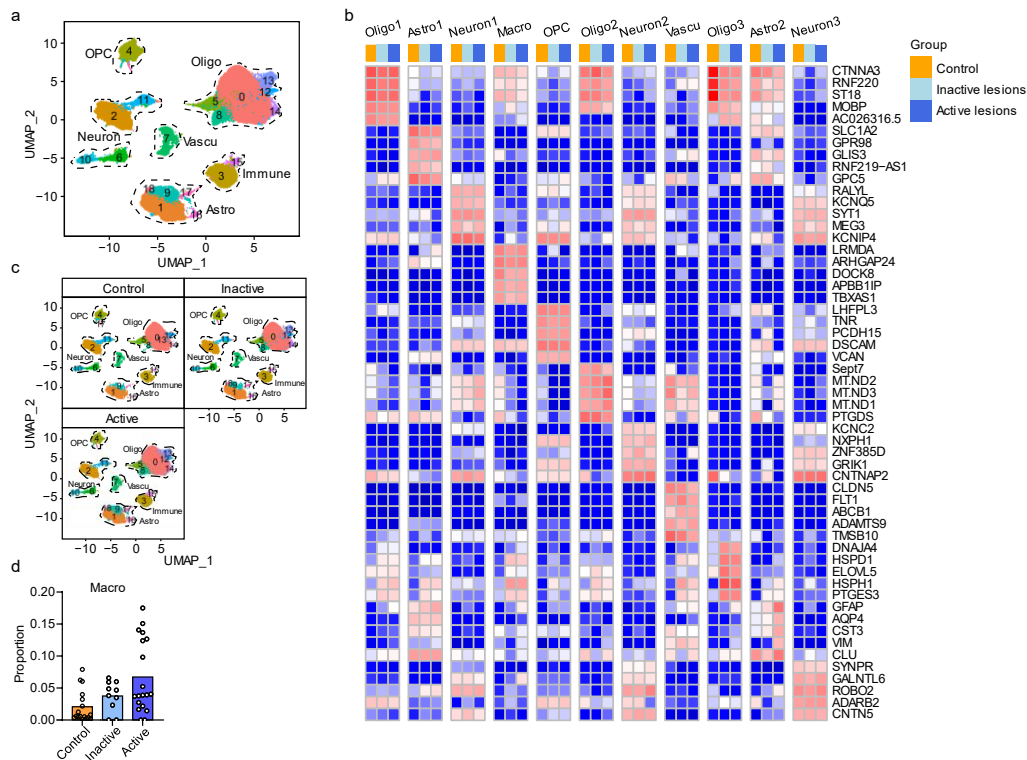

2

3 **Supplementary Fig.1 Single-nuclei RNA sequencing identifies changes in major brain cell**  
 4 **types in healthy control, MS inactive lesions and MS active lesions, related to Fig 1.**

5 a. Single-nuclei RNA sequencing (snRNA-seq) initial mapping (UMAP plot) and annotations based  
 6 on the top differentially expressed genes in each cluster after re-analysis of raw data from Schirmer  
 7 et al,<sup>15</sup> Jäkel et al,<sup>16</sup> and Absinta et al.<sup>17</sup>

8 b. Heatmap showing distinct cell types identified by cell-type-specific markers.

9 c. Overview of all cell populations in healthy control, MS inactive lesions and MS active lesions by  
 10 UMAP plots.

11 d. Relative frequency of “microglia/macrophages” cluster in each group. The Y axis range is 0 to 1.

12

13

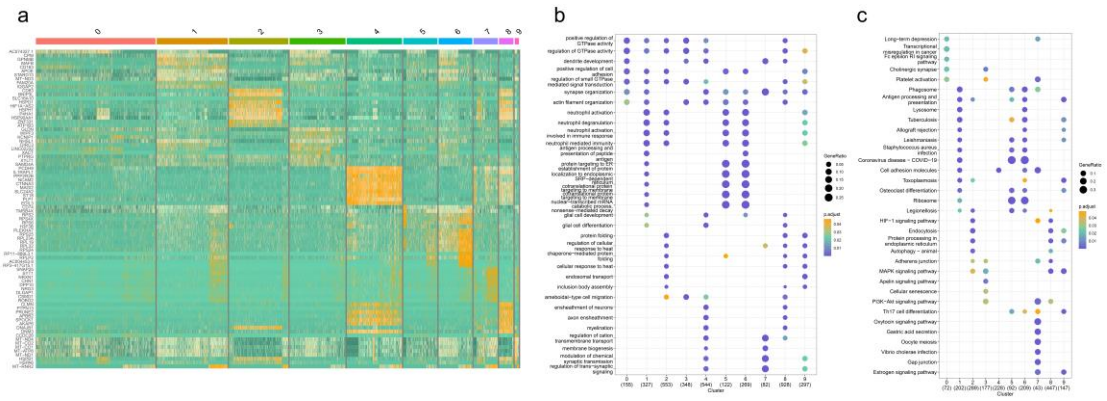

14

15 **Supplementary Fig. 2 Transcriptional profiles and functional enrichment of different**  
 16 **microglial subclusters, related to Fig 1.**

17 a. Heatmap illustrating transcriptional profiles of different microglial subclusters

18 b. Biological processes (BP) enrichment of different microglial subclusters.

19 c. KEGG signaling pathways enrichment of different microglial subclusters.

20

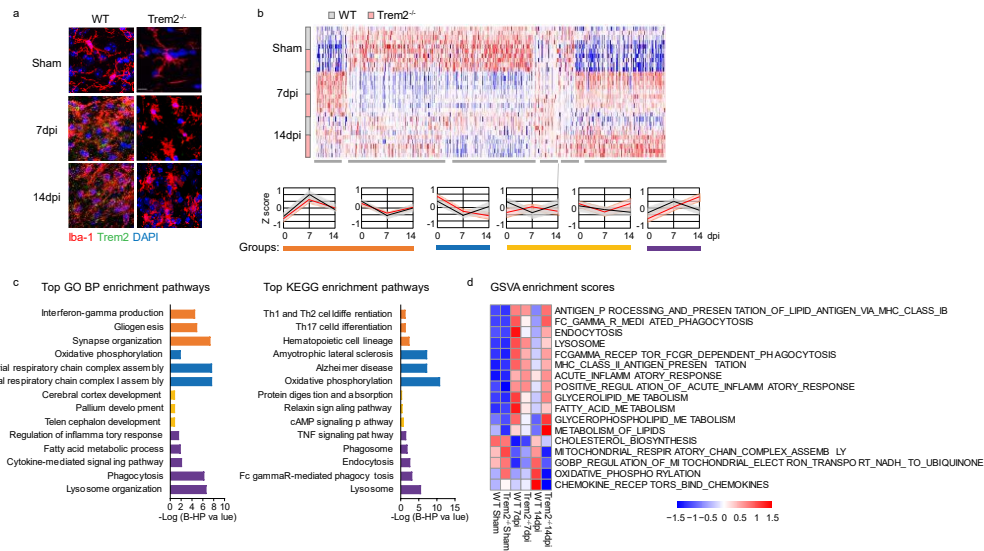

22

23

**Supplementary Fig. 3 Trem2 deficiency induces pronounced and sustained alterations in microglial transcriptome during acute demyelination and remyelination in vivo, related to Fig 5.**

24

25

**a**, Representative images of Iba-1 (red), Trem2 (green) and DAPI (blue) immunostaining in Trem2<sup>-/-</sup> mice and wild-type control with LPC injection. Scale bar, 20µm.

26

27

**b-c**, Transcriptome analysis was performed using RNA sequencing of microglia sorted from the following groups of mice: sham Trem2<sup>-/-</sup> and control mice, Trem2<sup>-/-</sup> and control mice at 7 dpi, and Trem2<sup>-/-</sup> and control mice at 14 dpi. n = 4-5 mice per group. Heatmap depicting gene clusters associated with genotype and disease stage based on transcripts that displayed a P value <0.01 and fold change >1.5. The scale represents Z-score-transformed expression values (with red and blue indicating up-regulated and down-regulated genes, respectively, compared with the mean value of a gene from all samples). These gene clusters were further grouped according to their pattern of expression into the four groups that were analyzed using GO and KEGG to annotate significance.

28

29

30

31

32

33

34

35

36

37

**d**, Heatmap showing the differences in biological processes by GSVA enrichment scores among the different groups.

38

39

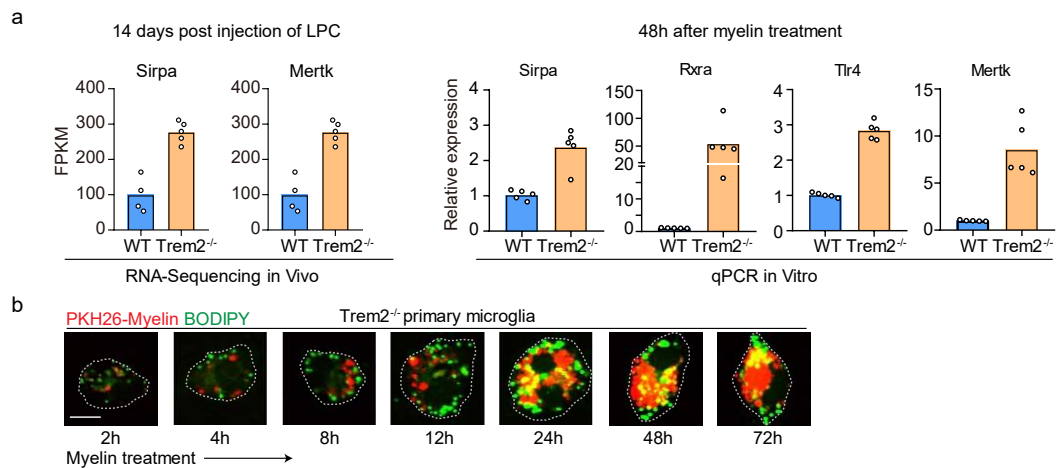

40

41 **Supplementary Fig. 4 Compensatory phagocytosis and impaired lipid metabolism in Trem2<sup>-/-</sup>**  
 42 **microglia, related to Fig 5, 6 and 7.**

43 **a**, Quantification of transcriptional expression via RNA sequencing of sorted microglia from control  
 44 and Trem2<sup>-/-</sup> mice at 14 dpi, and RT-PCR analysis of gene expression in Trem2<sup>-/-</sup> and wild-type  
 45 microglia 48h after myelin debris treatment. n = 4-5 mice per group, or 5 biologically independent  
 46 replicates.

47 **b**, Representative images of PKH26-Myelin (red), and BODIPY (green) immunostaining in Trem2<sup>-/-</sup>  
 48 <sup>-/-</sup> with myelin treatment. Scale bar, 10µm.

49

50

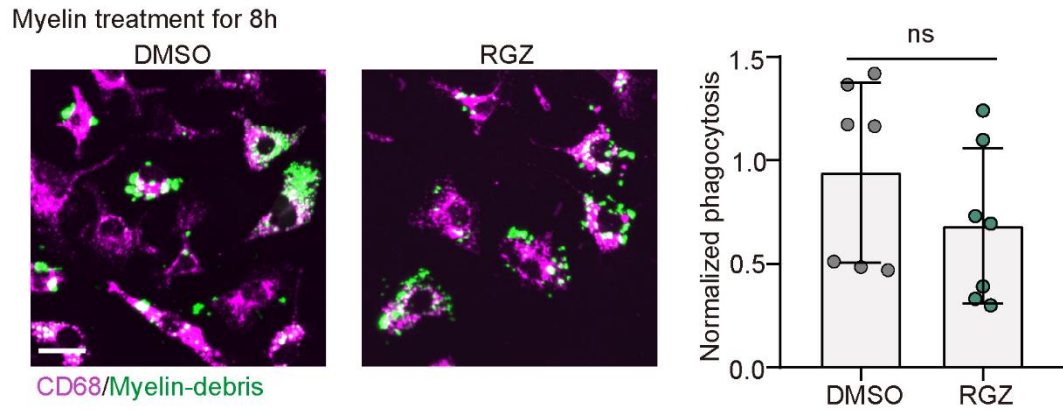

51

52 **Supplementary Fig. 5 Phagocytosis in myelin debris treated microglia with or without**  
 53 **rosiglitazone, related to Fig 6.**

54 Representative images and quantification of phagocytosis in myelin debris treated microglia with  
 55 or without rosiglitazone. Scale bar, 20µm. Normalized intensity of myelin debris shown as n = 7  
 56 biologically independent replicates, mean ± SD, unpaired t-test.

57

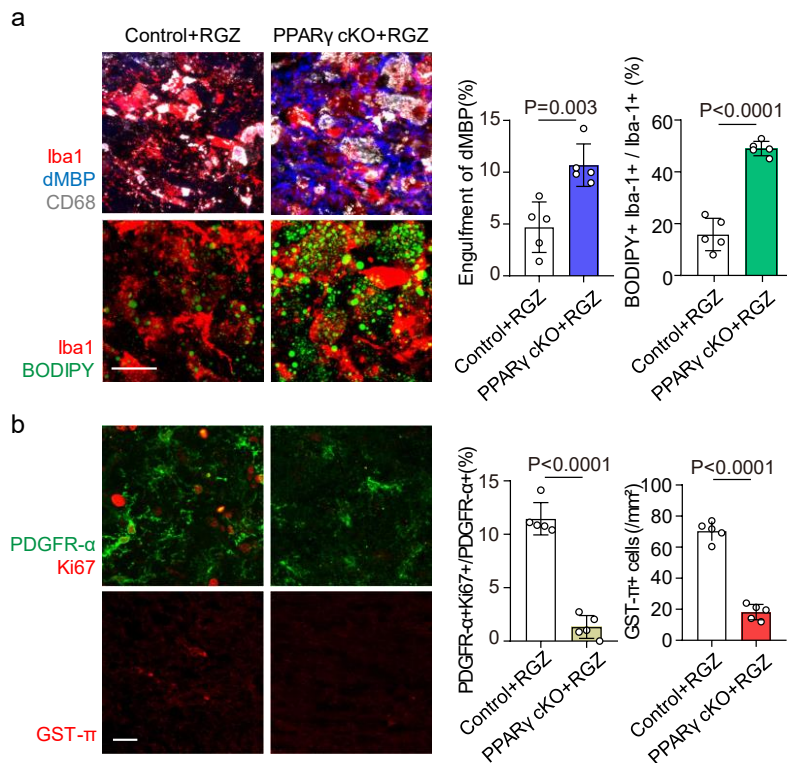

59

60 **Supplementary Fig. 6 Rosiglitazone administration promoted microglial remyelination via**  
 61 **PPAR- $\gamma$  signaling pathway, related to Fig 7.**

62 **a**, Representative images of Iba-1 (red), dMBP (blue) and CD68 (white), or Iba-1 (red) and BODIPY  
 63 (green) immunostaining in microglia-specific PPAR- $\gamma$  deficient mice (Cx3cr1CreER<sup>+/+</sup>-PPAR- $\gamma$ <sup>fl/fl</sup>,  
 64 PPAR- $\gamma$  cKO) or littermate controls with rosiglitazone treatment at 7 dpi. Scale bar, 20  $\mu$ m.  
 65 Quantification of dMBP within microglia and the percentage of BODIPY<sup>+</sup> Iba-1<sup>+</sup> in Iba-1<sup>+</sup> cells. n  
 66 = 5 mice per group, mean  $\pm$  SD, unpaired t test.

67 **b**, Representative images of PDGFR- $\alpha$  (green) and Ki67 (red), and GST- $\pi$  (red) immunostaining in  
 68 PPAR- $\gamma$  cKO mice or littermate controls with rosiglitazone treatment at 7 dpi. Scale bar, 20  $\mu$ m.  
 69 Quantification of the percentage of proliferating OPCs (PDGFR- $\alpha$ <sup>+</sup>Ki67<sup>+</sup>/PDGFR- $\alpha$ <sup>+</sup> cells), and  
 70 mature oligodendrocytes (GST- $\pi$ <sup>+</sup>) densities. n = 5 mice per group, mean  $\pm$  SD, unpaired t test.

71

72

73

74

75

76

77

78

79

80

81 **Reference**

82 1. Sariol, A., Mackin, S., Allred, M.G., Ma, C., Zhou, Y., Zhang, Q., Zou, X., Abrahante, J.E.,  
83 Meyerholz, D.K., and Perlman, S. (2020). Microglia depletion exacerbates demyelination  
84 and impairs remyelination in a neurotropic coronavirus infection. *Proc Natl Acad Sci U S*  
85 *A 117*, 24464-24474.<http://doi.org/10.1073/pnas.2007814117>.

86 2. Chen, M., Yang, L.L., Hu, Z.W., Qin, C., Zhou, L.Q., Duan, Y.L., Bosco, D.B., Wu, L.J., Zhan,  
87 K.B., Xu, S.B., and Tian, D.S. (2020). Deficiency of microglial Hv1 channel is associated with  
88 activation of autophagic pathway and ROS production in LPC-induced demyelination  
89 mouse model. *J Neuroinflammation 17*, 333.<http://doi.org/10.1186/s12974-020-02020->  
90 [y](http://doi.org/10.1186/s12974-020-02020-y).

91 3. Qin, C., Liu, Q., Hu, Z.W., Zhou, L.Q., Shang, K., Bosco, D.B., Wu, L.J., Tian, D.S., and Wang,  
92 W. (2018). Microglial TLR4-dependent autophagy induces ischemic white matter damage  
93 via STAT1/6 pathway. *Theranostics 8*, 5434-5451.<http://doi.org/10.7150/thno.27882>.

94 4. Schafer, D.P., Lehrman, E.K., Kautzman, A.G., Koyama, R., Mardinly, A.R., Yamasaki, R.,  
95 Ransohoff, R.M., Greenberg, M.E., Barres, B.A., and Stevens, B. (2012). Microglia sculpt  
96 postnatal neural circuits in an activity and complement-dependent manner. *Neuron 74*,  
97 691-705.<http://doi.org/10.1016/j.neuron.2012.03.026>.

98 5. Werneburg, S., Jung, J., Kunjamma, R.B., Ha, S.K., Luciano, N.J., Willis, C.M., Gao, G., Biscola,  
99 N.P., Havton, L.A., Crocker, S.J., et al. (2020). Targeted Complement Inhibition at Synapses  
100 Prevents Microglial Synaptic Engulfment and Synapse Loss in Demyelinating Disease.  
101 *Immunity 52*, 167-182 e167.<http://doi.org/10.1016/j.immuni.2019.12.004>.

102 6. Liu, L., Besson-Girard, S., Ji, H., Gehring, K., Bulut, B., Kaya, T., Usifo, F., Simons, M., and  
103 Gokce, O. (2021). Dissociation of microdissected mouse brain tissue for artifact free  
104 single-cell RNA sequencing. *STAR Protoc 2*,  
105 100590.<http://doi.org/10.1016/j.xpro.2021.100590>.

106 7. Carlstrom, K.E., Zhu, K., Ewing, E., Krabbendam, I.E., Harris, R.A., Falcao, A.M., Jagodic, M.,  
107 Castelo-Branco, G., and Piehl, F. (2020). Gsta4 controls apoptosis of differentiating adult  
108 oligodendrocytes during homeostasis and remyelination via the mitochondria-associated  
109 Fas-Casp8-Bid-axis. *Nat Commun 11*, 4071.<http://doi.org/10.1038/s41467-020-17871->  
110 [5](http://doi.org/10.1038/s41467-020-17871-5).

111 8. Liu, K.M., and Shen, C.L. (1985). Ultrastructural sequence of myelin breakdown during  
112 Wallerian degeneration in the rat optic nerve. *Cell Tissue Res 242*, 245-  
113 256.<http://doi.org/10.1007/BF00214537>.

114 9. Savage, J.C., Picard, K., Gonzalez-Ibanez, F., and Tremblay, M.E. (2018). A Brief History of  
115 Microglial Ultrastructure: Distinctive Features, Phenotypes, and Functions Discovered Over  
116 the Past 60 Years by Electron Microscopy. *Front Immunol 9*,  
117 803.<http://doi.org/10.3389/fimmu.2018.00803>.

118 10. Marschallinger, J., Iram, T., Zardeneta, M., Lee, S.E., Lehallier, B., Haney, M.S., Pluvinage,  
119 J.V., Mathur, V., Hahn, O., Morgens, D.W., et al. (2020). Lipid-droplet-accumulating  
120 microglia represent a dysfunctional and proinflammatory state in the aging brain. *Nat*  
121 *Neurosci 23*, 194-208.<http://doi.org/10.1038/s41593-019-0566-1>.

122 11. Nugent, A.A., Lin, K., van Lengerich, B., Lianoglou, S., Przybyla, L., Davis, S.S., Llapashtica,  
123 C., Wang, J., Kim, D.J., Xia, D., et al. (2020). TREM2 Regulates Microglial Cholesterol  
124 Metabolism upon Chronic Phagocytic Challenge. *Neuron 105*, 837-854



- 125 e839.<http://doi.org/10.1016/j.neuron.2019.12.007>.
- 126 12. Cantuti-Castelvetri, L., Fitzner, D., Bosch-Queralt, M., Weil, M.T., Su, M., Sen, P., Ruhwedel,  
127 T., Mitkovski, M., Trendelenburg, G., Lutjohann, D., et al. (2018). Defective cholesterol  
128 clearance limits remyelination in the aged central nervous system. *Science* 359, 684-  
129 688.<http://doi.org/10.1126/science.aan4183>.
- 130 13. Hu, Y., Mai, W., Chen, L., Cao, K., Zhang, B., Zhang, Z., Liu, Y., Lou, H., Duan, S., and Gao,  
131 Z. (2020). mTOR-mediated metabolic reprogramming shapes distinct microglia functions  
132 in response to lipopolysaccharide and ATP. *Glia* 68, 1031-  
133 1045.<http://doi.org/10.1002/glia.23760>.
- 134 14. Zhou, T., Zheng, Y., Sun, L., Badea, S.R., Jin, Y., Liu, Y., Rolfe, A.J., Sun, H., Wang, X., Cheng,  
135 Z., et al. (2019). Microvascular endothelial cells engulf myelin debris and promote  
136 macrophage recruitment and fibrosis after neural injury. *Nat Neurosci* 22, 421-  
137 435.<http://doi.org/10.1038/s41593-018-0324-9>.
- 138 15. Schirmer, L., Velmeshev, D., Holmqvist, S., Kaufmann, M., Werneburg, S., Jung, D., Vistnes,  
139 S., Stockley, J.H., Young, A., Steindel, M., et al. (2019). Neuronal vulnerability and  
140 multilineage diversity in multiple sclerosis. *Nature* 573, 75-  
141 82.<http://doi.org/10.1038/s41586-019-1404-z>.
- 142 16. Jakel, S., Agirre, E., Mendanha Falcao, A., van Bruggen, D., Lee, K.W., Knuesel, I., Malhotra,  
143 D., Ffrench-Constant, C., Williams, A., and Castelo-Branco, G. (2019). Altered human  
144 oligodendrocyte heterogeneity in multiple sclerosis. *Nature* 566, 543-  
145 547.<http://doi.org/10.1038/s41586-019-0903-2>.
- 146 17. Absinta, M., Maric, D., Gharagozloo, M., Garton, T., Smith, M.D., Jin, J., Fitzgerald, K.C.,  
147 Song, A., Liu, P., Lin, J.P., et al. (2021). A lymphocyte-microglia-astrocyte axis in chronic  
148 active multiple sclerosis. *Nature* 597, 709-714.[http://doi.org/10.1038/s41586-021-](http://doi.org/10.1038/s41586-021-03892-7)  
149 [03892-7](http://doi.org/10.1038/s41586-021-03892-7).
- 150
